# Supplementary material for: Fluorescence imaging of surface-versatile latent fingerprints at the second and third level using double ESIPT-based AIE fluorophore
Source: Royal Society of Chemistry journal article supplement (doi:10.1039/d1nj00678a), 2021-01-01
Supplement: d1nj00678a1.pdf [file d1nj00678a1.pdf]

## Supporting information

# Fluorescence Imaging of Surface-Versatile Latent Fingerprints at Second and Third level using double ESIPT based AIE fluorophore

Manzoor Ahmad<sup>a</sup>, Gulshan Kumar<sup>b</sup> Vijay Luxami<sup>b</sup>, Satwinderjeet Kaur<sup>c</sup>, Prabhpreet Singh<sup>a</sup>, Subodh Kumar<sup>a</sup> \*

- a. *Department of Chemistry, Center for Advanced Studies, Guru Nanak Dev University, Amritsar – 143005*
- b. *School of chemistry and biochemistry, Thapar institute of engineering and technology, Patiala – 147004*
- c. *Department of Botanical and Environment Science, Guru Nanak Dev University, Amritsar - 143005*

Corresponding Author. Email: [subodh.chem@gndu.ac.in](mailto:subodh.chem@gndu.ac.in)

## Table of Contents

| S.No. | Content                                                                                                                                                                                   | Page No. |
|-------|-------------------------------------------------------------------------------------------------------------------------------------------------------------------------------------------|----------|
| 1     | Figure S1: <sup>1</sup> H NMR spectrum of <b>2</b>                                                                                                                                        | 2        |
| 2     | Figure S2: <sup>13</sup> C NMR spectrum of <b>2</b>                                                                                                                                       | 2        |
| 3     | Figure S3: High resolution mass spectrum of <b>2</b>                                                                                                                                      | 3        |
| 4     | Figure S4: <sup>1</sup> H NMR spectrum of HBPI                                                                                                                                            | 3        |
| 5     | Figure S5: <sup>13</sup> C NMR spectrum of HBPI                                                                                                                                           | 4        |
| 6     | Figure S6: High resolution mass spectrum of HBPI                                                                                                                                          | 4        |
| 7     | Figure. S7. TDDFT Optimized structures for HPBI conformations and their keto tautomers                                                                                                    | 5        |
| 8     | Figure S8: UV-Vis spectrum of HPBI (5 μM) in CH <sub>3</sub> CN-water binary mixtures; (A) 0 – 40% water; (B) 60 – 99% water                                                              | 5        |
| 9     | Table S1: Quantum yields of solutions of <b>HPBI</b>                                                                                                                                      | 5        |
| 10    | Figure S9: (A) HPBI concentration dependent fluorescence spectra; (B) Plot of fluorescence intensity against [HPBI] in 1:1 CH <sub>3</sub> CN-water (1:1)                                 | 6        |
| 11    | Figure S10: Solution of HPBI (50 μM, CH <sub>3</sub> CN-water 1:1), (A) under fluorescence microscope; (B) in day light; (C) Scattering of light under red laser pointer - Tyndall effect | 6        |
| 12    | Figure S11:- The LFPs deposited on foil paper and developed after different intervals of time                                                                                             | 6        |
|       |                                                                                                                                                                                           |          |

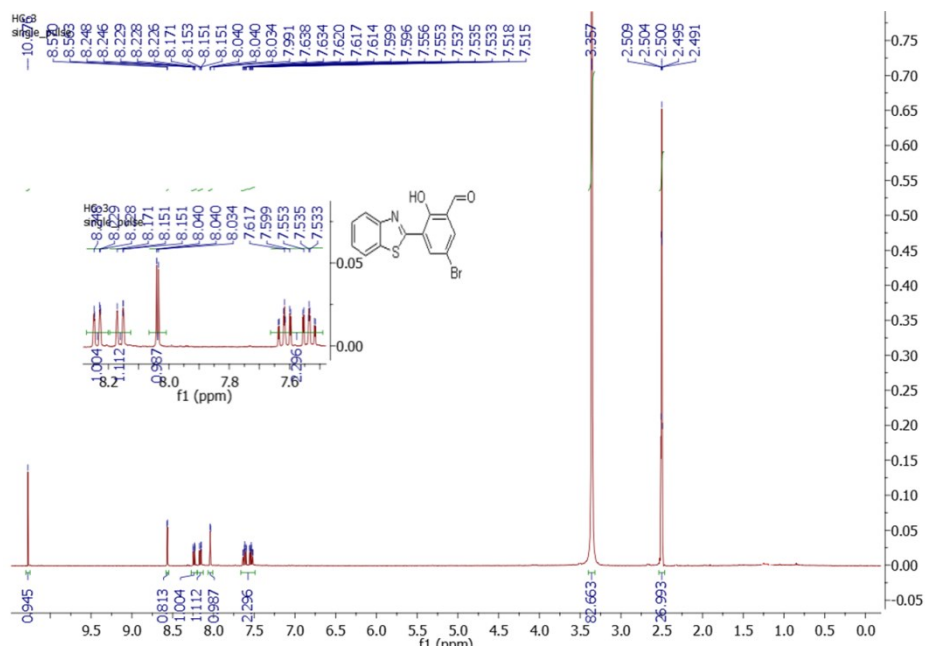

Figure S1:  $^1\text{H}$  NMR spectrum of 2

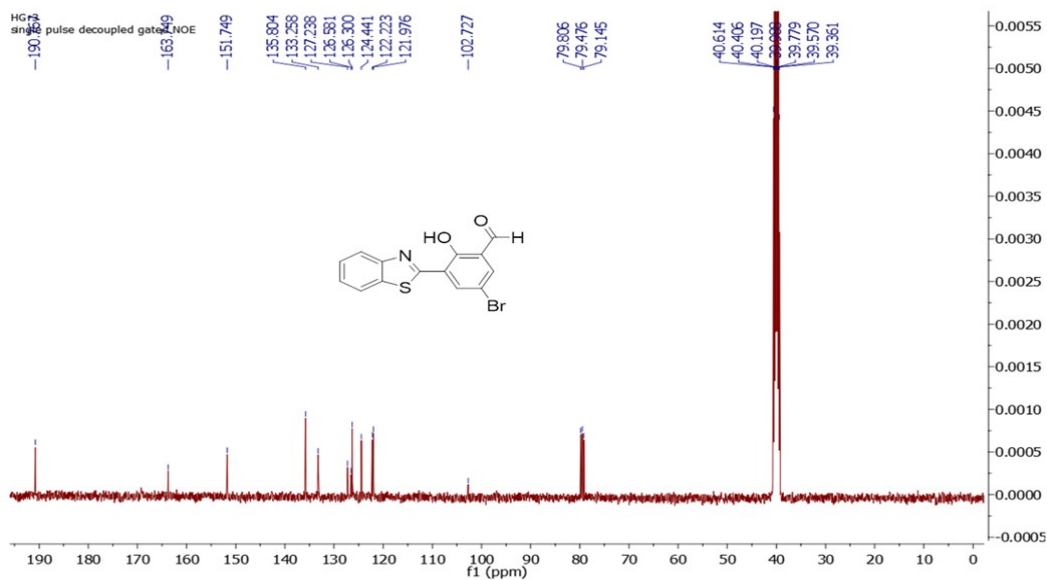

Figure S2:  $^{13}\text{C}$  NMR spectrum of 2

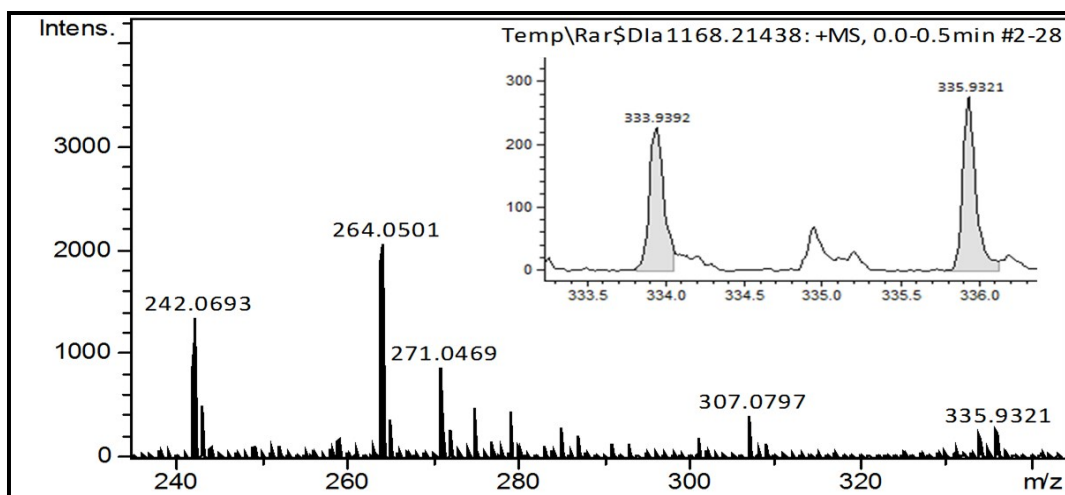

Figure S3: High resolution mass spectrum of **2**

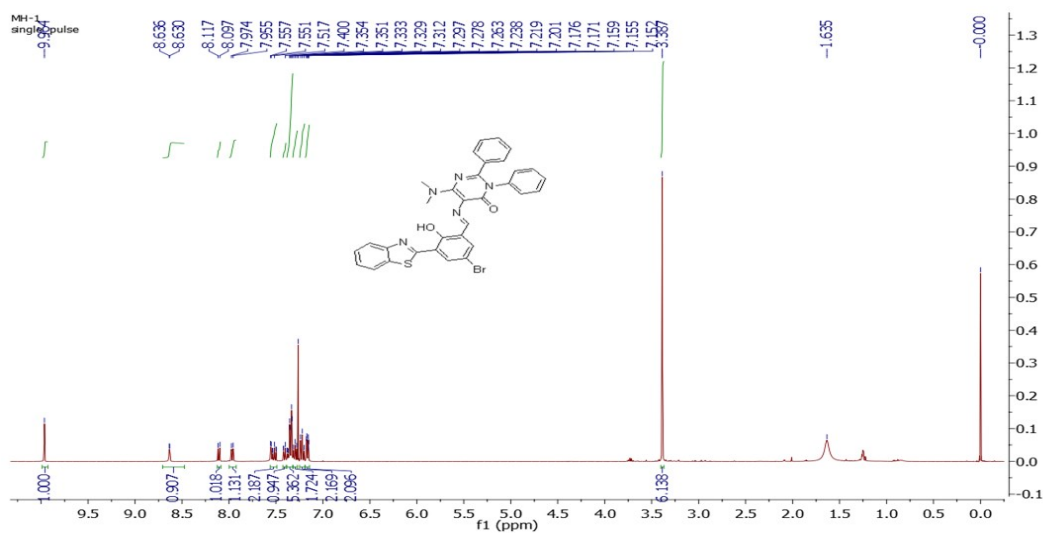

Figure S4:  $^1\text{H}$  NMR spectrum of HBPI

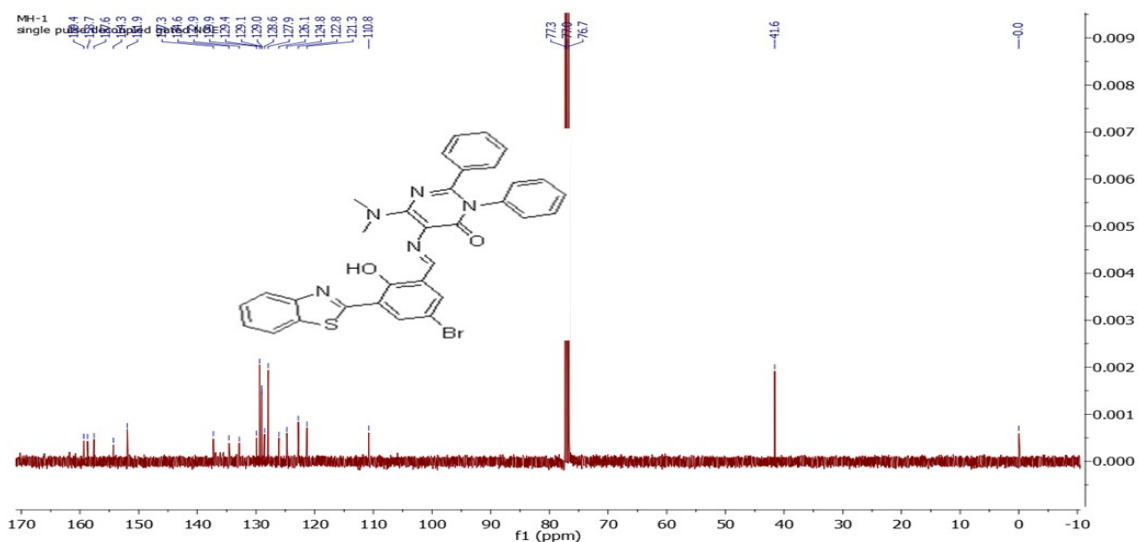

Figure S5:  $^{13}\text{C}$  NMR spectrum of HBPI

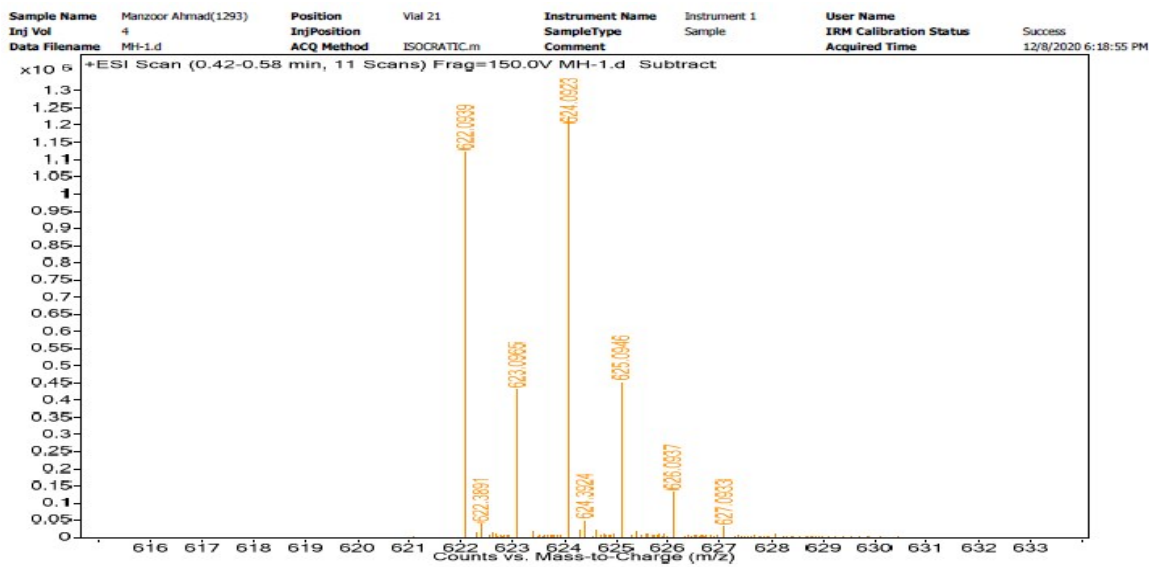

Figure S6: High resolution mass spectrum of HBPI

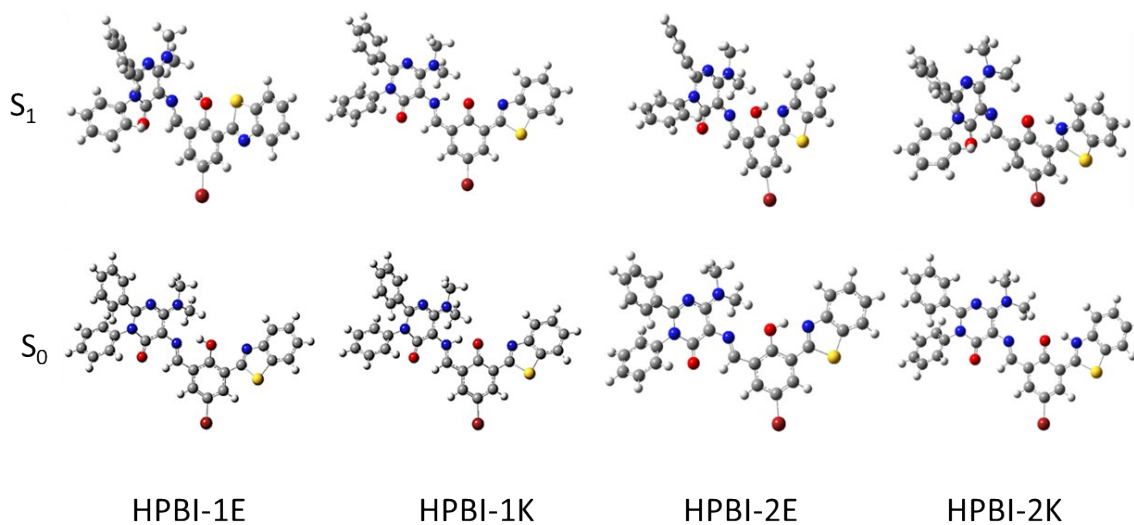

Figure. S7. TDDFT Optimized structures for HPBI conformations and their keto tautomers

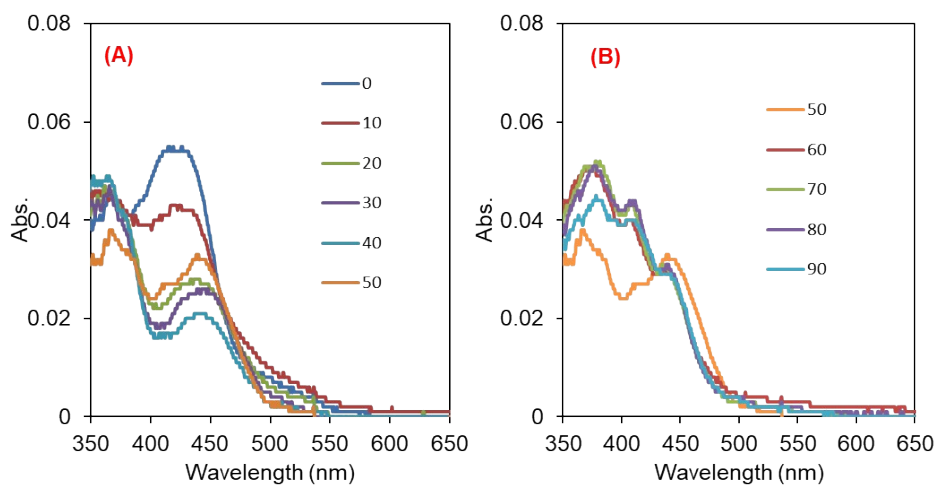

Figure S8: UV-Vis spectrum of HPBI (5  $\mu\text{M}$ ) in  $\text{CH}_3\text{CN}$ -water binary mixtures; (A) 0 – 40% water; (B) 60 – 99% water

Table SI-1: Quantum yields of solutions of **HPBI**

| Sr. No. | HPBI (5 $\mu\text{M}$ )                  | $\Phi \lambda_{\text{ex}}$ 350 nm <sup>a</sup> | $\Phi \lambda_{\text{ex}}$ 430 nm <sup>b</sup> |
|---------|------------------------------------------|------------------------------------------------|------------------------------------------------|
| 1       | $\text{CH}_3\text{CN}$                   | 0.160                                          | 0.04                                           |
| 2       | $\text{CH}_3\text{CN-H}_2\text{O}$ (1:1) | 0.218                                          | 0.03                                           |
| 3       | $\text{CH}_3\text{CN-H}_2\text{O}$ (1:9) | 0.03                                           | 0.01                                           |

<sup>a</sup>quinine sulphate (1  $\mu\text{M}$ , 0.1M  $\text{HClO}_4$ ); <sup>b</sup>fluorescein (1  $\mu\text{M}$ , 0.1N  $\text{NaOH}$ )

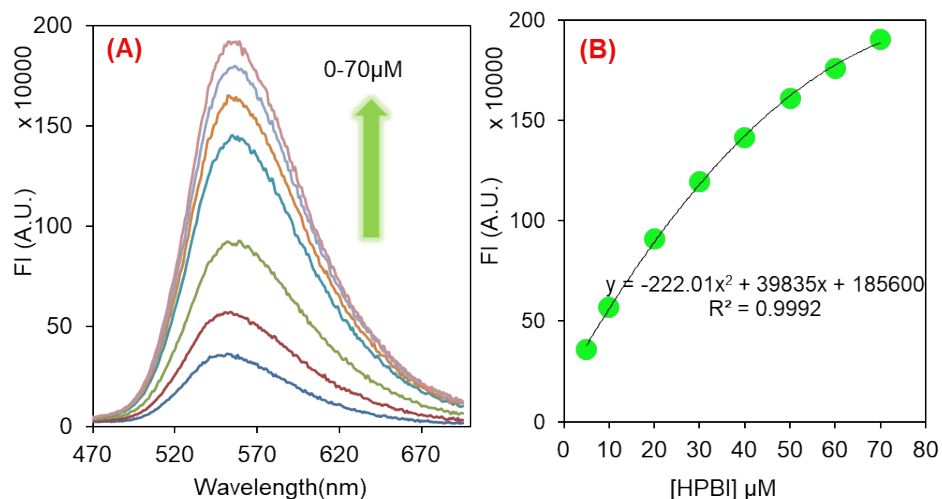

Figure S9: (A) HPBI concentration dependent fluorescence spectra; (B) Plot of fluorescence intensity against [HPBI] in 1:1 CH<sub>3</sub>CN-water (1:1)

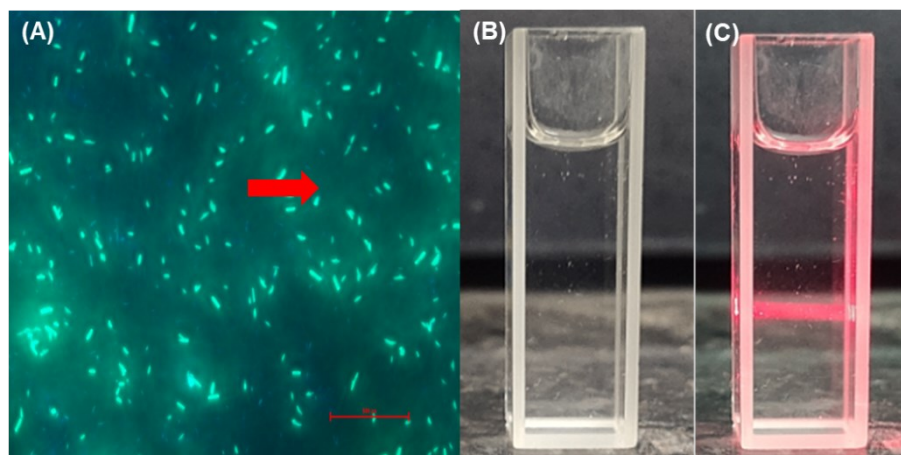

Figure S10: Solution of HPBI (50 μM, CH<sub>3</sub>CN-water 1:1), (A) under fluorescence microscope; (B) in day light; (C) Scattering of light under red laser pointer - Tyndall effect

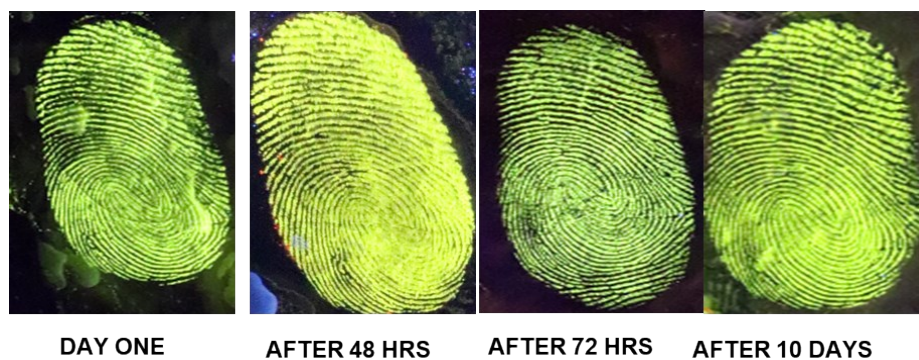

Figure S11:- The LFPs deposited on foil paper and developed after different intervals of time
